# Supplementary material for: SBDM v1.0: A scaling-based discretization method for the Geographical Detector Model
Source: Copernicus journal article supplement (doi:10.5194/gmd-2018-274), 2018-11-30
Supplement: Supplementary file 1 [file Ecological_Detector.xlsx]

## Sheet: Ecological
Method	p value
	1&2	1&3	1&4	1&5	1&6	1&7	2&3	2&4	2&5	2&6	2&7	3&4	3&5	3&6	3&7	4&5	4&6	4&7	5&6	5&7	6&7
SBDM	0	0	0	0	0	0	0	0	0	0	0	0.315808	0	0	0	0	0	0	0	0	0
EI	0	0	0	0	0	0	0	0	0	0	0	0	0	0	0	0	0	0	0	0	0.00299772
NB	0	0	0	0	0	0	0	0	0	0	0	0	0	0	0	0	0	0	0	0	0.00116207
QU	0	0	0	0	0	0	0	0	0	0	0	0	0	0	0	0	0	0	0	0	0.00779677
GI	0	0	0	0	0	0	0	0	0	0	0	0	0	0	0	1	0	0	0	0	0.0173558
	The symbol “&” connects the F- test of two factors.
	The seven numbers ("1", "2", "3", "4", "5", "6", "7") refer to the factors "PREC", "WV", "TEMP", "DEM", "SD", "SH", "SA", respectively.
