# Supplementary material for: SBDM v1.0: A scaling-based discretization method for the Geographical Detector Model
Source: Copernicus journal article supplement (doi:10.5194/gmd-2018-274), 2018-11-30
Supplement: Supplementary file 2 [file Factor_Detector.xlsx]

## Sheet: factor
Factor	Method	Cut Points							q Value
PREC	SBDM	22	70	120	138	180	279	458	0.325565
	EI	22	95	168	241	313	386	458	0.297716
	NB	22	75	116	167	225	298	458	0.307413
	QU	22	56	74	104	137	198	458	0.30925
	GI	22	56	74	108	167	272	458	0.308715
WV	SBDM	2.2	2.4	2.8	2.9	3.3	3.9	5.9	0.227816
	EI	2.2	2.9	3.5	4.1	4.7	5.3	5.9	0.199574
	NB	2.2	2.8	3.3	3.8	4.5	5.2	5.9	0.216322
	QU	2.2	2.8	3.2	3.6	4	5.1	5.9	0.210395
	GI	2.2	2.7	3.1	3.6	4.2	5	5.9	0.204165
TEMP	SBDM	-11	-3.3	-1	4.4	7.9	12.2	16	0.175459
	EI	-11	-6.4	-1.9	2.6	7.1	11.6	16	0.147592
	NB	-11	-2.9	1	4.8	8.4	11.6	16	0.159117
	QU	-11	-1.1	4.5	8.3	11.4	13.2	16	0.168636
	GI	-11	-2.1	3.8	8.1	11	13.1	16	0.159098
DEM	SBDM	-157	788	1588	2072	3246	3763	7913	0.174719
	EI	-157	1189	2534	3879	5224	6569	7913	0.0883322
	NB	-157	870	1516	2406	3439	4527	7913	0.151676
	QU	-157	813	1049	1249	1878	3570	7913	0.15346
	GI	-157	898	1100	1138	1340	2394	7913	0.0460462
SD	SBDM	1	4	7	9	11	32	89	0.068062
	EI	1	16	31	46	60	75	89	0.0343048
	NB	1	8	15	24	33	44	89	0.0597636
	QU	1	3	4	5	8	18	89	0.0621638
	GI	1	4	5	7	14	34	89	0.0629572
SH	SBDM	1.1	2.1	3.1	5.7	6.1	9.7	10.2	0.021111
	EI	1.1	2.7	4.2	5.7	7.2	8.7	10.2	0.0065374
	NB	1.1	3	4.1	5.2	6.4	8	10.2	0.00706127
	QU	1.1	3	3.9	4.8	5.8	6.7	10.2	0.0055673
	GI	1.1	2.9	3.9	4.6	5.6	7.4	10.2	0.0049477
SA	SBDM	0	1	32	166	204	269	359	0.004177
	EI	0	60	120	180	240	300	359	0.00141106
	NB	0	67	131	180	229	293	359	0.00138172
	QU	0	87	146	180	211	273	359	0.00105306
	GI	0	89	145	180	215	271	359	0.00100445
