# Supplementary material for: SBDM v1.0: A scaling-based discretization method for the Geographical Detector Model
Source: Copernicus journal article supplement (doi:10.5194/gmd-2018-274), 2018-11-30
Supplement: Supplementary file 3 [file Interaction_Detector.xlsx]

## Sheet: interaction
SBDM			a	b	c	d	ab	ac	ad	bc	bd	cd	abc	abd	acd	bcd	abcd
			0.325565	0.227816	0.17546	0.174719	0.422871	0.378847	0.483255	0.334331	0.345196	0.348371	0.46713	0.535797	0.503773	0.441076	0.561357		1. The number of intersections of different associated letters is the interaction q value.
	e	0.0680626	0.35598	0.290778	0.218519	0.251706	0.464321	0.41288	0.511853	0.383309	0.389455	0.388923	0.509322	0.569249	0.535986	0.486592	0.597909		e.g., In the SBDM method, the last row and column number (0.6593 in red font) is the interaction q value of "abcdefg" factors.
	f	0.021111	0.363326	0.268033	0.209399	0.23939	0.476666	0.425633	0.528621	0.404883	0.392984	0.39102	0.520568	0.574904	0.553452	0.495018	0.60155
	g	0.00417774	0.33367	0.235707	0.182084	0.183906	0.435375	0.39376	0.497274	0.35008	0.359208	0.361815	0.48517	0.55341	0.52363	0.463032	0.582667		2. The letters "a","b","c","d","e","f","g" represent "PREC","WV","TEMP","DEM","SD","SH","SA" factors, respectively.
	ef	0.0956927	0.404004	0.337863	0.255757	0.303219	0.519048	0.46407	0.556892	0.446089	0.43382	0.429031	0.559891	0.606814	0.587143	0.536109	0.637358
	eg	0.0752348	0.365045	0.302992	0.226596	0.26355	0.480045	0.428099	0.527253	0.401865	0.406835	0.404269	0.528609	0.589451	0.555524	0.509455	0.619723
	fg	0.0274998	0.374741	0.280999	0.218091	0.250218	0.492159	0.443091	0.544908	0.424416	0.410396	0.407848	0.539695	0.595407	0.574717	0.519485	0.623814
	efg	0.105535	0.417797	0.355005	0.2673	0.317558	0.537159	0.482926	0.574485	0.467953	0.455047	0.448021	0.579801	0.628856	0.607887	0.560779	0.659269
EI			a	b	c	d	ab	ac	ad	bc	bd	cd	abc	abd	acd	bcd	abcd
			0.297716	0.199574	0.147592	0.0883322	0.402998	0.344795	0.443794	0.3157	0.272349	0.298839	0.448431	0.50037	0.473908	0.400761	0.53491
	e	0.0343048	0.306473	0.230701	0.157779	0.14366	0.418846	0.357791	0.454293	0.328797	0.297404	0.309272	0.462442	0.509525	0.481108	0.409336	0.542785
	f	0.0065374	0.33089	0.226388	0.192017	0.153691	0.462867	0.396623	0.50185	0.405849	0.322642	0.354452	0.510127	0.544807	0.535981	0.478552	0.578036
	g	0.00141106	0.302511	0.204834	0.150423	0.0947351	0.414273	0.354789	0.457075	0.328885	0.282953	0.305778	0.463968	0.51539	0.490994	0.419248	0.553586
	ef	0.0402121	0.345178	0.270398	0.209855	0.199065	0.476383	0.40641	0.509659	0.418202	0.351556	0.367021	0.519213	0.55289	0.542783	0.487359	0.584936
	eg	0.0363999	0.312764	0.236981	0.161706	0.151168	0.432072	0.36907	0.467724	0.343319	0.308206	0.317627	0.479953	0.525344	0.498895	0.428656	0.562666
	fg	0.0129785	0.34012	0.238838	0.199178	0.169503	0.479603	0.411527	0.517396	0.426357	0.338733	0.369434	0.530234	0.563055	0.555209	0.501746	0.599731
	efg	0.0475778	0.356495	0.283545	0.218499	0.215541	0.494531	0.423421	0.526062	0.440406	0.36761	0.384003	0.541306	0.572249	0.563294	0.511912	0.608142
NB			a	b	c	d	ab	ac	ad	bc	bd	cd	abc	abd	acd	bcd	abcd
			0.307413	0.216322	0.159117	0.151676	0.418339	0.355833	0.472738	0.324644	0.325378	0.334775	0.462501	0.532766	0.507558	0.435173	0.569161
	e	0.0597636	0.318999	0.262852	0.169706	0.213487	0.440156	0.373981	0.487751	0.34216	0.349115	0.352512	0.483921	0.544935	0.519363	0.448631	0.582553
	f	0.00706127	0.336225	0.245808	0.211833	0.2513	0.471276	0.412675	0.535356	0.428048	0.404647	0.41999	0.52092	0.582675	0.572943	0.529403	0.617932
	g	0.00138172	0.312332	0.221738	0.162193	0.162719	0.429746	0.367509	0.489824	0.338927	0.338638	0.345521	0.479487	0.550211	0.527734	0.457495	0.590953
	ef	0.0803461	0.362081	0.325137	0.237235	0.300651	0.498155	0.432562	0.548055	0.446825	0.432396	0.441445	0.539965	0.595985	0.585103	0.545074	0.630719
	eg	0.0627498	0.326527	0.271445	0.174789	0.225467	0.455205	0.388359	0.505807	0.359708	0.364717	0.366253	0.503738	0.564169	0.541636	0.47392	0.606381
	fg	0.0134167	0.346691	0.259663	0.219955	0.265748	0.488276	0.430426	0.5555	0.44862	0.424222	0.437164	0.542011	0.603529	0.596582	0.553793	0.640244
	efg	0.0877994	0.376811	0.340181	0.248277	0.318506	0.518846	0.454899	0.570615	0.471612	0.454454	0.462007	0.564944	0.619213	0.612	0.571919	0.656178
QU			a	b	c	d	ab	ac	ad	bc	bd	cd	abc	abd	acd	bcd	abcd
			0.30925	0.210395	0.168636	0.15346	0.407798	0.372011	0.456722	0.331073	0.327174	0.319087	0.453261	0.510377	0.496069	0.436454	0.555099
	e	0.0621638	0.336053	0.274835	0.208453	0.220075	0.452724	0.402885	0.493797	0.384481	0.374032	0.366876	0.496553	0.555446	0.529292	0.489625	0.595766
	f	0.0055673	0.331454	0.238296	0.220256	0.247539	0.46202	0.418732	0.516498	0.440738	0.420331	0.403321	0.521421	0.57221	0.55842	0.535093	0.611892
	g	0.00105306	0.313449	0.214815	0.171336	0.159751	0.41805	0.382704	0.469531	0.34339	0.338297	0.329109	0.469436	0.527218	0.512424	0.456544	0.575528
	ef	0.0801472	0.378058	0.330326	0.26372	0.306969	0.513776	0.463381	0.556346	0.480933	0.468291	0.44922	0.564057	0.612306	0.597593	0.575894	0.649578
	eg	0.0652633	0.342693	0.283898	0.214037	0.231997	0.467126	0.416193	0.508906	0.402832	0.39294	0.382601	0.515824	0.573253	0.548735	0.51342	0.616245
	fg	0.00946191	0.340889	0.251187	0.226816	0.259249	0.478927	0.434259	0.533826	0.458754	0.438019	0.418944	0.540627	0.592414	0.578143	0.555666	0.633445
	efg	0.0879858	0.393134	0.349538	0.275794	0.325753	0.533935	0.483479	0.575584	0.503796	0.49083	0.469505	0.585956	0.633319	0.618579	0.598997	0.670823
GI			a	b	c	d	ab	ac	ad	bc	bd	cd	abc	abd	acd	bcd	abcd
			0.308715	0.204165	0.159098	0.0460462	0.405624	0.352413	0.383355	0.329062	0.267912	0.25922	0.456376	0.477383	0.439155	0.398063	0.523081
	e	0.0629572	0.338932	0.269564	0.199389	0.12853	0.453426	0.39008	0.419675	0.381072	0.318911	0.301679	0.500929	0.520289	0.474446	0.452869	0.562798
	f	0.0049477	0.334881	0.227481	0.203528	0.129147	0.474467	0.400354	0.445813	0.434439	0.348624	0.338044	0.521436	0.540864	0.507758	0.497369	0.57951
	g	0.00100445	0.312473	0.209286	0.161717	0.0533768	0.416195	0.361927	0.397673	0.342264	0.281752	0.269365	0.470454	0.494016	0.456479	0.420677	0.542259
	ef	0.0802829	0.380789	0.323944	0.24902	0.208304	0.527365	0.451935	0.48294	0.481092	0.407173	0.380074	0.566529	0.580614	0.548232	0.540612	0.617659
	eg	0.066074	0.345468	0.279602	0.205004	0.13945	0.467692	0.402162	0.437337	0.401247	0.340979	0.317717	0.518377	0.540238	0.495474	0.480053	0.583943
	fg	0.00902299	0.344178	0.240993	0.20995	0.140798	0.490027	0.415435	0.463849	0.453723	0.367419	0.355192	0.540299	0.558976	0.528872	0.519934	0.599412
	efg	0.0889183	0.395132	0.344171	0.261923	0.227084	0.546217	0.471209	0.503332	0.505339	0.434085	0.402147	0.58817	0.601417	0.570848	0.566291	0.639486
