# Supplementary material for: SBDM v1.0: A scaling-based discretization method for the Geographical Detector Model
Source: Copernicus journal article supplement (doi:10.5194/gmd-2018-274), 2018-11-30
Supplement: Supplementary file 4 [file Report.xlsx]

## Sheet: Reports
Factors	Scale	Scaling path	Cut Points							USTC	DSTC(with different sliding number)			q value
											1	2	3
PREC	30	---	0*	2*	4*	5*	6*	9*	15*	39s	---	---	---	0.319
	20	30-20	1&1*	3&3*	6&6*	7&7*	9&9*	14&14*	22&22*	5m	19s	26s	35s	0.32197&0.32197*
	10	20-10	2&2*	7&7*	12&12*	14&14*	18&18*	28&28*	45&45*	4.5h	34s	1.2m	6m	0.32412&0.32412*
	5	10-5	4&4*	14&14*	25&25*	28&28*	36&36*	56&56*	91&91*	7.6d	41s	4.8m	15m	0.32413&0.32413*
	3	5-3	7	23	40	46	60	93	152	34.7y	40s	4.2m	19m	0.32536
	1	5-1	22	70	120	138	180	279	458	63.9 y	2.5m	1h	8h	0.32556
WV	3	---	7*	8*	9*	10*	11*	13*	19*	14 s	---	---	---	0.22317*
	1	3-1	22&22*	24&24*	28&28*	29&29*	33&33*	39&39*	59&59*	1.8 h	26s	31s	36s	0.22781&0.22781*
TEMP	20	---	-6*	-1*	0*	2*	4*	6*	8*	31s	---	---	---	0.17264*
	12	20-12	-10&-10*	-3&-3*	-1&-1*	4&4*	7&7*	10&10*	13&13*	7.5 m	20s	26s	30s	0.17234&0.17234*
	6	12-6	-19&-19*	-6&-6*	-2&-2*	7&7*	13&13*	20&20*	26&26*	8.8 h	32s	3.5m	4.8m	0.17361&0.17361*
	3	6-3	-37&-37*	-11&-11*	-3&-3*	15&15*	27&27*	41&41*	53&53*	14.1 d	32s	17m	1.5h	0.17479&0.17479*
	1	3-1	-110	-33	-10	44	79	122	160	5.7 y	2.3m	1.1h	8.3h	0.17545
DEM	500	---	-1	1*	3*	4*	7*	8*	15*	1.2m	---	---	---	0.16422*
	200	500-200	-1&-1*	3&3*	8&8*	10&10*	16&16*	19&19*	39&39*	3 h	1m	2.1m	3m	0.17199&0.17199*
	150	200-150	-2&-2*	5&5*	10&10*	13&13*	22&22*	25&25*	52&52*	12.8 h	20s	1m	3.4m	0.17355&0.17355*
	100	150-100	-2&-2*	7&7*	16&16*	20&20*	33&33*	38&38*	79&79*	4.5 d	22s	2.9m	6.9m	0.17267&0.17267*
	50	100-50	-4	15	31	39	66	76	158	0.4 y	32s	8.9m	39.2m	0.17366
	40	50-40	-4	19	39	49	82	94	197	1.2 y	20s	---	---	0.17389
	40	50-40	-4	19	39	49	83	97	197	1.2 y	---	1.9m	10m	0.17398
	30	40-30	-6	26	53	66	110	128	263	5.6 y	20s	---	---	0.17427
	30	40-30	-6	26	53	67	110	126	263	5.6 y	---	2.1m	---	0.17435
	30	40-30	-6	26	53	69	108	125	263	5.6 y	---	---	15.4m	0.17454
	20	30-20	-8	39	79	103	162	188	395	43 y	22s	3.7m	---	0.17442
	20	30-20	-8	39	79	103	165	189	395	43 y	---	---	20.7m	0.17443
	10	20-10	-16	78	159	207	330	378	791	1403 y	32s	9.1m	---	0.17453
	10	20-10	-16	78	159	207	324	375	791	1403 y	---	---	1.1h	0.17454
	5	10-5	-32	157	318	414	649	750	1582	45179 y	33s	---	---	0.17466
	5	10-5	-32	157	318	414	651	753	1582	45179 y	---	9.1m	1.1h	0.17467
	1	5-1	-157	788	1588	2072	3246	3763	7913	1.42E+08 y	29s	3d	5.3d	0.17471
SD	6	---	0*	1*	2*	4*	5*	7*	14*	27s	---	---	---	0.05596*
	4	6-4	0&0*	1&1*	2&2*	3&3*	7&7*	11&11*	22&22*	6.9m	30s	47s	1m	0.06632&0.06632*
	2	4-2	0	2	3	4	5	15	44	4.9 h	1.2m	---	---	0.06753
	2	4-2	0&0*	2&2*	3&3*	4&4*	5&5*	16&16*	44&44*	4.9 h	---	18m	30m	0.06766&0.06766*
	1	2-1	0&0*	4&4*	7&7*	9&9*	11&11*	32&32*	89&89*	7.2 d	53s	5.4m	22.6m	0.06806&0.06806*
SH	6	---	1*	4*	5*	9*	10*	16*	17*	1m	---	---	---	0.01574*
	4	6-4	2&2*	5&5*	8&8*	14&14*	15&15*	24&24*	25&25*	7.6 m	23s	35s	1.5m	0.01739&0.01739*
	2	4-2	5&5*	11&11*	16&16*	28&28*	30&30*	49&49*	51&51*	5.3 h	25s	2.6m	6.8m	0.01870&0.01870*
	1	2-1	11&11*	21&21*	31&31*	57&57*	61&61*	97&97*	102&102*	7.6 d	34s	6.1m	24.9m	0.02111&0.02111*
SA	30	---	0*	1*	2*	6*	7*	9*	11*	9s	---	---	---	0.00207*
	10	30-10	0&0*	1&1*	4&4*	17&17*	20&20*	27&27*	35	1.4 h	2m	3.1m	4m	0.00233&0.00233*
	5	10-5	0&0*	1&1*	6&6*	33&33*	41&41*	54&54*	71&71*	2.4 d	30s	7.1m	22.7m	0.00303&0.00303*
	1	5-1	0	1	32	166	204	269	359	24 y	34.1m	13.6h	3.1d	0.004177
	The data with * markers are the results without downscaling processing (just direct upscaling calculation).
	The data without * markers are the results from downscaling based on the last scale, e.g., In SH factor, the results (cut points, time costing and q-value)of scale 2 is based on the results of scale 4 when downscaling is applied (scaling path: 4-2) and scale 1 is based on scale 2 (scaling path: 2-1) .
	The USTC means upscaling time costing and the DSTC is the downscaling time costing with different sliding numbers (Δσ). The red fonts are estimated values.
	The letters “s”, “m”, “h” , “d” and "y"represent seconds, minutes, hours, days, and years respectively
