# Supplementary material for: SBDM v1.0: A scaling-based discretization method for the Geographical Detector Model
Source: Copernicus journal article supplement (doi:10.5194/gmd-2018-274), 2018-11-30
Supplement: Supplementary file 5 [file Risk_Detector.xlsx]

## Sheet: risk
Method	Factor	p Value between Substrata																Average of NDVI in different substrata
		1&2	1&3	1&4	1&5	1&6	2&3	2&4	2&5	2&6	3&4	3&5	3&6	4&5	4&6	5&6		1	2	3	4	5	6		The symbol “&” connects the student T test results of two substrata.
SBDM	Precipitation	0	0	0	0	0	0	0	0	0	0	0	0	0	0	0		9.03968	14.277	16.3363	25.0622	37.9582	47.322
	Wind Velocity	0	0	0	0	0	0	0	0	0	0	0	0	0	0	0		47.5024	34.9677	26.8986	21.7989	15.0108	10.4468
	Temperature	0	0	0	0	0	0	0	0	0	0	0	0	0	0	0		14.3534	21.5679	36.0219	23.6898	16.2347	11.3741
	DEM	0	0	0	0.2342	0	0	0	0	0	0	0	0	0	0	0		24.1244	14.6584	28.4169	37.4797	24.058	10.164
	Slope Degree	0	0	0	0	0	0	0	0	0	0	0	0	0	0.0003	0		18.0084	14.1475	18.9673	24.018	28.2414	23.5177
	Specific Humidity	0	0	0	0	0	0	0	0	0	0	0	0	0	0	0		14.9553	23.8697	19.5793	14.0207	18.8599	33.965
	Slope Aspect	0	0	0	0	0	0	0	0	0	0	0.2678	0	0	0.0097	0		41.8988	21.5592	19.5147	18.695	19.481	18.5576
EI	Precipitation	0	0	0	0	0	0	0	0	0	0	0	0	0	0	0		10.7517	18.1256	35.7993	41.5159	49.702	38.2277
	Wind Velocity	0	0	0	0	0	0	0	0	0	0	0	0	0	0	0		34.6307	19.4436	14.063	9.86192	10.441	11.0855
	Temperature	0	0	0	0	0.0028	0	0	0	0	0	0	0	0	0	0		12.4116	16.2412	34.3001	27.3797	17.1731	12.1442
	DEM	0	0	0	0	0	0	0	0	0	0	0	0	0	0	0		16.9325	23.2513	30.7165	10.804	5.77505	3.12963
	Slope Degree	0	0	0	0	0	0	0	0	0	0	0	0	0	0	0		17.7031	28.4089	24.6367	19.1698	12.535	5.08
	Specific Humidity	0	0	0	0	0	0	0	0	0	0	0	0	0	0	0		21.0288	20.5199	19.3512	17.1328	16.5622	22.3036
	Slope Aspect	0	0	0	0	0	0.3092	0.0001	0.0904	0	0	0.0267	0	0.0191	0	0		21.2933	19.2326	19.2627	19.0108	19.1411	18.4575
NB	Precipitation	0	0	0	0	0	0	0	0	0	0	0	0	0	0	0		9.64058	14.2486	19.8426	35.2724	39.2192	48.4185
	Wind Velocity	0	0	0	0	0	0	0	0	0	0	0	0	0	0	0		36.7729	22.8313	15.2256	10.9279	10.0405	11.0733
	Temperature	0	0	0	0	0	0	0	0	0	0	0	0	0	0	0		14.7676	28.6109	35.6962	22.5799	15.535	12.1442
	DEM	0	0	0	0	0	0	0	0	0	0	0	0	0	0	0		20.5821	14.8222	29.7621	36.1433	15.7774	8.50726
	Slope Degree	0	0	0	0	0	0	0	0	0	0	0	0	0	0	0		16.1321	24.9539	29.0765	26.955	24.3987	19.3987
	Specific Humidity	0	0	0	0	0	0	0	0	0	0	0	0	0	0	0		21.5628	20.1636	19.872	16.6248	19.3037	18.7776
	Slope Aspect	0	0	0	0	0	0.0186	0	0.4381	0	0	0.0139	0	0	0	0		21.1537	19.2231	19.3531	18.9152	19.2129	18.4837
QU	Precipitation	0	0	0	0	0	0	0	0	0	0	0	0	0	0	0		7.82428	11.2391	14.158	15.6795	27.9903	40.4824
	Wind Velocity	0	0	0	0	0	0	0	0	0	0	0	0	0	0	0		36.7729	22.7093	16.9226	14.0927	9.79666	11.0879
	Temperature	0	0	0	0	0	0	0	0	0	0	0	0	0	0	0		16.8752	35.727	23.0478	15.4708	13.9364	10.4891
	DEM	0	0	0	0	0	0.2352	0	0	0	0	0	0	0	0	0		22.0626	13.9119	13.8754	20.5435	34.5904	10.9915
	Slope Degree	0.0217	0	0.0003	0.0137	0.0028	0	0	0	0	0	0	0	0	0	0		21.764	18.0067	13.7379	15.235	25.8845	27.0114
	Specific Humidity	0	0	0	0	0	0	0	0	0	0	0	0	0	0	0		21.5628	20.1865	19.8966	18.0547	16.9048	18.9977
	Slope Aspect	0	0	0	0	0	0	0	0.4906	0	0	0	0	0	0.0004	0		20.5789	19.4343	19.1476	18.7664	19.4328	18.5511
GI	Precipitation	0	0	0	0	0	0	0	0	0	0	0	0	0	0	0		7.82428	11.2391	14.1814	19.0839	36.0768	46.6413
	Wind Velocity	0	0	0	0	0	0	0	0	0	0	0	0	0	0	0		37.9363	24.7213	17.8322	13.2981	9.5575	11.0649
	Temperature	0	0	0.4622	0	0	0	0	0	0	0	0	0	0	0	0		15.5085	34.0368	24.3821	15.5141	14.5853	10.5466
	DEM	0	0	0	0	0.2691	0	0	0	0	0	0	0	0	0	0		20.2001	14.2199	12.3564	14.5142	26.4762	20.2326
	Slope Degree	0	0	0	0	0	0	0	0	0	0	0	0	0	0.0911	0		18.0084	13.7379	14.5841	22.8757	28.2823	23.0505
	Specific Humidity	0	0	0	0	0	0	0	0	0	0	0	0	0	0	0		21.5291	20.3138	19.661	19.2897	17.5301	17.7891
	Slope Aspect	0	0	0	0	0	0	0	0.4351	0	0	0	0	0	0	0		20.5225	19.4579	19.1537	18.8162	19.4468	18.5576
